# Supplementary material
Source: Springer Nature journal article supplement (https://www.springermedizin.de/resource/supplementary/12885_2013_5277_MOESM4_ESM.pdf/9465636)
Supplement: MOESM4 [file 9465636]

Additional Table 4. Relationship between gene status and MFS.

|                           | Total population (%) | Number of relapses (%) | <i>P</i> -value <sup>a</sup> |
|---------------------------|----------------------|------------------------|------------------------------|
| <i>Total</i>              | 458 (100.0)          | 170 (37.1)             |                              |
| <i>EGFR</i>               |                      |                        |                              |
| Underexpression           | 389 (84.9)           | 153 (39.3)             | NS                           |
| Non-underexpression       | 69 (15.1)            | 17 (24.6)              |                              |
| <i>PIK3R1</i>             |                      |                        |                              |
| Underexpression           | 283 (61.8)           | 122 (43.1)             | <b>0.00028</b>               |
| Non-underexpression       | 175 (38.2)           | 48 (27.4)              |                              |
| <i>PDK1</i>               |                      |                        |                              |
| Underexpression           | 61 (13.3)            | 22 (36.1)              | NS                           |
| Normal expression         | 316 (69.0)           | 116 (36.7)             |                              |
| Overexpression            | 81 (17.7)            | 32 (39.5)              |                              |
| <i>PTEN</i>               |                      |                        |                              |
| Underexpression           | 78 (17.0)            | 31 (39.7)              | NS                           |
| Non-underexpression       | 380 (83.0)           | 139 (36.6)             |                              |
| <i>AKT1</i>               |                      |                        |                              |
| Non-overexpression        | 342 (74.7)           | 123 (36.0)             | NS                           |
| Overexpression            | 116 (25.3)           | 47 (40.5)              |                              |
| <i>AKT2<sup>b</sup></i>   |                      |                        |                              |
| Non-overexpression        | 293 (64.3)           | 119 (40.6)             | NS                           |
| Overexpression            | 163 (35.7)           | 50 (30.7)              |                              |
| <i>AKT3<sup>b</sup></i>   |                      |                        |                              |
| Underexpression           | 306 (67.1)           | 120 (39.2)             | NS                           |
| Non-underexpression       | 150 (32.9)           | 49 (32.7)              |                              |
| <i>GOLPH3</i>             |                      |                        |                              |
| Non-overexpression        | 369 (80.6)           | 131 (35.5)             | NS                           |
| Overexpression            | 89 (19.4)            | 39 (43.8)              |                              |
| <i>P70S6K</i>             |                      |                        |                              |
| Non-overexpression        | 375 (81.9)           | 134 (35.7)             | NS                           |
| Overexpression            | 83 (18.1)            | 36 (43.4)              |                              |
| <i>WEE1</i>               |                      |                        |                              |
| Underexpression           | 84 (18.3)            | 34 (40.5)              | NS                           |
| Non-underexpression       | 374 (81.7)           | 136 (36.4)             |                              |
| <i>PIK3CA</i>             |                      |                        |                              |
| Non-mutated (%)           | 307 (67.0)           | 124 (40.4)             | <b>0.016</b>                 |
| Mutated (%)               | 151 (33.0)           | 46 (30.5)              |                              |
| <i>PIK3R1<sup>c</sup></i> |                      |                        |                              |

|                                  |            |            |              |
|----------------------------------|------------|------------|--------------|
| Non-mutated (%)                  | 444 (97.8) | 163 (36.7) | NS           |
| Mutated (%)                      | 10 (2.2)   | 4 (40.0)   |              |
| <i>AKT1<sup>d</sup></i>          |            |            |              |
| Non-mutated (%)                  | 442 (96.7) | 164 (37.1) | NS           |
| Mutated (%)                      | 15 (3.3)   | 5 (33.3)   |              |
| <i>All mutations<sup>d</sup></i> |            |            |              |
| Non-mutated (%)                  | 280 (61.7) | 113 (40.4) | <b>0.016</b> |
| Mutated (%)                      | 174 (38.3) | 54 (31.0)  |              |

---

<sup>a</sup>Log-rank Test. NS: not significant.

<sup>b</sup>Data available in 456 samples.

<sup>c</sup>Data available in 454 samples.

<sup>d</sup>Data available in 457 samples
